# Supplementary material for: A Systematic Review and Network Meta-Analysis to Evaluate the Comparative Efficacy of Interventions for Unfit Patients with Chronic Lymphocytic Leukemia
Source: Springer Nature journal article supplement (doi:10.1007/s12325-016-0398-2), 2016-08-17
Supplement: MOESM1 [file 10592412]

## **SUPPLEMENTARY MATERIAL**

A: Search Strategy

B: Systematic Literature Search and Screening Process for Trials

C: BUGS Code Used for the Network Meta-Analysis

D: Summary of Results for the Main Analysis and Additional Analysis Using the Random Effects, with Informative Prior, Model

E: Summary of Hazard Ratios for all Pairwise Comparisons

## **A: Search Strategy**

The search strategy employed for the clinical review in Embase® with the search hits as of February 27, 2013 is presented in Table S1. The combined search strings for the Cochrane database using the Cochrane Central Register of Controlled Trials, the Cochrane Database of Systematic Reviews, and the Database of Abstracts of Reviews of Effects as product filter are presented in Table S2. The combined search strings for MEDLINE® In-Process are presented in Table S3.

**Table S1** Search strategy for clinical review in Embase® and MEDLINE® (searched through Embase.com on February 27, 2013)

| No. | Query                                                           | Results   |
|-----|-----------------------------------------------------------------|-----------|
| 1   | 'clinical trial'/exp                                            | 940 678   |
| 2   | 'randomization'/de                                              | 60 237    |
| 3   | 'controlled study'/de                                           | 3 972 102 |
| 4   | 'comparative study'/de                                          | 662 870   |
| 5   | 'single blind procedure'/de                                     | 16 468    |
| 6   | 'double blind procedure'/de                                     | 112 466   |
| 7   | 'crossover procedure'/de                                        | 35 411    |
| 8   | 'placebo'/de                                                    | 227 169   |
| 9   | 'clinical trial'                                                | 1 082 859 |
| 10  | 'clinical trials'                                               | 191 470   |
| 11  | 'controlled clinical trial'                                     | 472 240   |
| 12  | 'controlled clinical trials'                                    | 11 789    |
| 13  | 'randomised controlled trial'                                   | 12 409    |
| 14  | 'randomized controlled trial'                                   | 368 714   |
| 15  | 'controlled trials'                                             | 59 891    |
| 16  | 'randomized controlled trials'                                  | 29 448    |
| 17  | 'randomisation'                                                 | 5181      |
| 18  | 'randomization'                                                 | 73 289    |
| 19  | random*                                                         | 909 291   |
| 20  | rct                                                             | 13 190    |
| 21  | 'random allocation'                                             | 1342      |
| 22  | 'randomly allocated'                                            | 18 522    |
| 23  | 'allocated randomly'                                            | 1864      |
| 24  | allocated NEAR/2 random                                         | 797       |
| 25  | assign* NEAR/2 random*                                          | 76 504    |
| 26  | randomi*                                                        | 617 058   |
| 27  | (single OR double OR triple OR treble) NEAR/1 (blind* OR mask*) | 196 738   |
| 28  | placebo*                                                        | 305 678   |
| 29  | 'prospective study'/de                                          | 216 805   |
| 30  | Nrct                                                            | 46        |
| 31  | 'n rct'                                                         | 1         |
| 32  | n?rct                                                           | 24        |
| 33  | 'controlled clinical trial'/exp                                 | 439 628   |
| 34  | 'prospective study'/exp                                         | 216 805   |

|    |                                                                                                                                                                                                                                                                                                                                                                                                                                                                                                                                                                                                                                                                                                                                                           |           |
|----|-----------------------------------------------------------------------------------------------------------------------------------------------------------------------------------------------------------------------------------------------------------------------------------------------------------------------------------------------------------------------------------------------------------------------------------------------------------------------------------------------------------------------------------------------------------------------------------------------------------------------------------------------------------------------------------------------------------------------------------------------------------|-----------|
| 35 | 'intervention study'/exp                                                                                                                                                                                                                                                                                                                                                                                                                                                                                                                                                                                                                                                                                                                                  | 15 627    |
| 36 | (clinical NEXT/1 trial*):ab,ti                                                                                                                                                                                                                                                                                                                                                                                                                                                                                                                                                                                                                                                                                                                            | 250 077   |
| 37 | 'major clinical study'/exp                                                                                                                                                                                                                                                                                                                                                                                                                                                                                                                                                                                                                                                                                                                                | 2 049 241 |
| 38 | compar*:ab,ti                                                                                                                                                                                                                                                                                                                                                                                                                                                                                                                                                                                                                                                                                                                                             | 3 992 223 |
| 39 | group*:ab,ti                                                                                                                                                                                                                                                                                                                                                                                                                                                                                                                                                                                                                                                                                                                                              | 2 909 497 |
| 40 | OR/1-39                                                                                                                                                                                                                                                                                                                                                                                                                                                                                                                                                                                                                                                                                                                                                   | 9 600 141 |
| 41 | 'case study'/de                                                                                                                                                                                                                                                                                                                                                                                                                                                                                                                                                                                                                                                                                                                                           | 20 489    |
| 42 | 'case report'                                                                                                                                                                                                                                                                                                                                                                                                                                                                                                                                                                                                                                                                                                                                             | 1 943 789 |
| 43 | 'abstract report'/de                                                                                                                                                                                                                                                                                                                                                                                                                                                                                                                                                                                                                                                                                                                                      | 89 565    |
| 44 | 'letter'/de                                                                                                                                                                                                                                                                                                                                                                                                                                                                                                                                                                                                                                                                                                                                               | 781 077   |
| 45 | OR/41-44                                                                                                                                                                                                                                                                                                                                                                                                                                                                                                                                                                                                                                                                                                                                                  | 2 669 114 |
| 46 | #40 NOT #45                                                                                                                                                                                                                                                                                                                                                                                                                                                                                                                                                                                                                                                                                                                                               | 9 343 300 |
| 47 | 'chronic lymphatic leukemia'/de                                                                                                                                                                                                                                                                                                                                                                                                                                                                                                                                                                                                                                                                                                                           | 21 060    |
| 48 | 'b cell leukemia'/exp                                                                                                                                                                                                                                                                                                                                                                                                                                                                                                                                                                                                                                                                                                                                     | 4973      |
| 49 | lymphom* near/2 lymphocyt*                                                                                                                                                                                                                                                                                                                                                                                                                                                                                                                                                                                                                                                                                                                                | 6862      |
| 50 | (leuk?em* OR leu?em* OR lymph*) near/2 (lymphocyt* OR lymphoblast* OR linfoid* OR 'b cell')                                                                                                                                                                                                                                                                                                                                                                                                                                                                                                                                                                                                                                                               | 417 736   |
| 51 | (chronic OR cronic OR 'well differential')                                                                                                                                                                                                                                                                                                                                                                                                                                                                                                                                                                                                                                                                                                                | 964 357   |
| 52 | #50 AND #51                                                                                                                                                                                                                                                                                                                                                                                                                                                                                                                                                                                                                                                                                                                                               | 50 117    |
| 53 | OR/47-49, 52                                                                                                                                                                                                                                                                                                                                                                                                                                                                                                                                                                                                                                                                                                                                              | 64 003    |
| 54 | 'chlorambucil'/syn OR amboclorin OR 'cb 1348' OR cb1348 OR chlorambacil OR chloraminophene OR chlorbutin OR chloroambucil OR chorambucil OR ecloril OR leuceran OR leukeran OR linfolysin OR lympholysin OR nsc 3088 OR nsc3088                                                                                                                                                                                                                                                                                                                                                                                                                                                                                                                           | 16 346    |
| 55 | 'fludarabine'/syn OR fludara                                                                                                                                                                                                                                                                                                                                                                                                                                                                                                                                                                                                                                                                                                                              | 16 123    |
| 56 | 'cladribine'/syn OR biodribin OR ntocel OR leustat OR leustatin OR leustatine OR litak OR litax OR movectro OR mylinax OR 'rwj 26251' OR rwj26251                                                                                                                                                                                                                                                                                                                                                                                                                                                                                                                                                                                                         | 4787      |
| 57 | 'bendamustine'/syn OR 'cimet 3393' OR cytotasan OR cytotasan r OR cytotasane OR 'imet 3393' OR levact OR ribomustin OR treanda                                                                                                                                                                                                                                                                                                                                                                                                                                                                                                                                                                                                                            | 1521      |
| 58 | 'alemtuzumab'/syn OR campath OR 'ldp 103' OR 'ldp103' OR lemtrada OR mabcampath                                                                                                                                                                                                                                                                                                                                                                                                                                                                                                                                                                                                                                                                           | 8902      |
| 59 | 'rituximab'/syn OR 'idec c2b8' OR mabthera OR reditux OR rituxan OR rituxin                                                                                                                                                                                                                                                                                                                                                                                                                                                                                                                                                                                                                                                                               | 32 061    |
| 60 | 'ofatumumab'/syn OR arzerra OR 'gsk 1841157' OR gsk1841157 OR 'humac CD20' OR HuMax-CD20 OR 'HuMax CD20' OR HuMaxCD20                                                                                                                                                                                                                                                                                                                                                                                                                                                                                                                                                                                                                                     | 876       |
| 61 | 'lenalidomide'/syn OR 'cc 5013' OR cc5013 OR 'cdc 501' OR cdc 5013 OR cdc501 OR cdc5013 OR 'enmd 0997' OR enmd0997 OR 'imid 3' OR imid3 OR revimid OR revlimid                                                                                                                                                                                                                                                                                                                                                                                                                                                                                                                                                                                            | 6597      |
| 62 | 'gs 1101'/syn OR 'cal 101' OR cal101 OR 'gs 1101' OR gs1101 OR idelalisib                                                                                                                                                                                                                                                                                                                                                                                                                                                                                                                                                                                                                                                                                 | 265       |
| 63 | 'obinutuzumab'/syn OR afutuzumab OR 'ga 101' OR ga101 OR r 7159 OR r7159 OR 'ro 5072759' OR ro5072759                                                                                                                                                                                                                                                                                                                                                                                                                                                                                                                                                                                                                                                     | 270       |
| 64 | 'cyclophosphamide'/syn OR carloxan OR ciclofosfamida OR ciclolen OR ciclofal OR clafen OR cyclo-cell OR cycloblastin OR cycloblastine OR 'cyclofos amide' OR cyclofosamid OR cyclofosamide OR cyclophar OR cyclophosphamid OR 'cyclophosphamide isopac' OR cyclophosphamides OR cyclophosphan OR cyclophosphane OR cyclostin OR cyclostin n OR cycloxan OR cyphos OR cytophosphan OR cytophosphane OR cytozan OR 'cytozan lyophilized' OR 'endocyclo phosphate' OR endoxan OR endoxan-asta OR 'endoxan asta' OR endoxana OR endoxon-asta OR enduxan OR genoxal OR ledoxan OR ledoxina OR 'lyophilized cytozan' OR mitoxan OR neosan OR neosar OR noristan OR 'nsc 26271' OR 'nsc 2671' OR procytox OR procytozide OR semdoxan OR sendoxan OR syklofosamid | 164 147   |
| 65 | cop NEAR/2 regimen                                                                                                                                                                                                                                                                                                                                                                                                                                                                                                                                                                                                                                                                                                                                        | 70        |
| 66 | chop NEAR/2 regimen                                                                                                                                                                                                                                                                                                                                                                                                                                                                                                                                                                                                                                                                                                                                       | 701       |
| 67 | Or/54-66                                                                                                                                                                                                                                                                                                                                                                                                                                                                                                                                                                                                                                                                                                                                                  | 204 213   |
| 68 | #46 AND #53 AND #67 AND [1992-2013]/py AND AND ([article]/lim OR [article in press]/lim OR [conference abstract]/lim OR [conference paper]/lim OR [erratum]/lim OR [note]/lim OR [short survey]/lim)                                                                                                                                                                                                                                                                                                                                                                                                                                                                                                                                                      | 4318      |

**Table S2** Search strategy for clinical review in Cochrane (searched through Cochrane Library interface on February 27, 2013)

| No. | Query                                                                                                                                                                                                                                                                                                                                                                                                                                                                                                                                                                                                                                                                                                                                                            | Results |
|-----|------------------------------------------------------------------------------------------------------------------------------------------------------------------------------------------------------------------------------------------------------------------------------------------------------------------------------------------------------------------------------------------------------------------------------------------------------------------------------------------------------------------------------------------------------------------------------------------------------------------------------------------------------------------------------------------------------------------------------------------------------------------|---------|
| 1   | MeSH descriptor: [Leukemia, Lymphocytic, Chronic, B-Cell] explode all trees                                                                                                                                                                                                                                                                                                                                                                                                                                                                                                                                                                                                                                                                                      | 197     |
| 2   | 'b cell leukaemia' OR 'b cell leukemia'                                                                                                                                                                                                                                                                                                                                                                                                                                                                                                                                                                                                                                                                                                                          | 1294    |
| 3   | lymphom* near/2 lymphocyt*                                                                                                                                                                                                                                                                                                                                                                                                                                                                                                                                                                                                                                                                                                                                       | 81      |
| 4   | (leuk?em* OR leu?em* OR lymph*) near/2 (lymphocyt* OR lymphoblast* OR linfoid* OR 'b cell')                                                                                                                                                                                                                                                                                                                                                                                                                                                                                                                                                                                                                                                                      | 11 116  |
| 5   | (chronic OR cronic OR 'well differential')                                                                                                                                                                                                                                                                                                                                                                                                                                                                                                                                                                                                                                                                                                                       | 58 350  |
| 6   | #4 AND #5                                                                                                                                                                                                                                                                                                                                                                                                                                                                                                                                                                                                                                                                                                                                                        | 1878    |
| 7   | OR/1-3, 6                                                                                                                                                                                                                                                                                                                                                                                                                                                                                                                                                                                                                                                                                                                                                        | 2857    |
| 8   | MeSH descriptor: [Chlorambucil] explode all trees                                                                                                                                                                                                                                                                                                                                                                                                                                                                                                                                                                                                                                                                                                                | 214     |
| 9   | (chlorambucil OR amboclorin OR 'cb 1348' OR cb1348 OR chlorambacil OR chloraminophene OR chlorbutin OR chloroambucil OR chorambucil OR ecloril OR leuceran OR leukeran OR linfolysin OR lympholysin OR nsc 3088 OR nsc3088):ab,ti,kw                                                                                                                                                                                                                                                                                                                                                                                                                                                                                                                             | 402     |
| 10  | (fludarabine OR fludara):ab,ti,kw                                                                                                                                                                                                                                                                                                                                                                                                                                                                                                                                                                                                                                                                                                                                | 340     |
| 11  | MeSH descriptor: [Cladribine] explode all trees                                                                                                                                                                                                                                                                                                                                                                                                                                                                                                                                                                                                                                                                                                                  | 1       |
| 12  | (cladribine OR biodribin OR ntocel OR leustat OR leustatin OR leustatine OR litak OR litax OR movectro OR mylinax OR 'rwj 26251' OR rwj26251): ab,ti,kw                                                                                                                                                                                                                                                                                                                                                                                                                                                                                                                                                                                                          | 125     |
| 13  | (bendamustine OR 'cimet 3393' OR cytotasan OR cytotasan r OR cytotasane OR 'imet 3393' OR levact OR ribomustin OR treanda): ab,ti,kw                                                                                                                                                                                                                                                                                                                                                                                                                                                                                                                                                                                                                             | 34      |
| 14  | (alemtuzumab OR campath OR 'ldp 103' OR 'ldp103' OR lemtrada OR mabcampath): ab,ti,kw                                                                                                                                                                                                                                                                                                                                                                                                                                                                                                                                                                                                                                                                            | 157     |
| 15  | (rituximab OR 'idec c2b8' OR mabthera OR reditux OR rituxan OR rituxin): ab,ti,kw                                                                                                                                                                                                                                                                                                                                                                                                                                                                                                                                                                                                                                                                                | 648     |
| 16  | (ofatumumab OR arzerra OR 'gsk 1841157' OR gsk1841157 OR 'humac CD20' OR HuMax-CD20 OR 'HuMax CD20' OR HuMaxCD20): ab,ti,kw                                                                                                                                                                                                                                                                                                                                                                                                                                                                                                                                                                                                                                      | 16      |
| 17  | (lenalidomide OR 'cc 5013' OR cc5013 OR 'cdc 501' OR cdc 5013 OR cdc501 OR cdc5013 OR 'enmd 0997' OR enmd0997 OR 'imid 3' OR imid3 OR revimid OR revlimid): ab,ti,kw                                                                                                                                                                                                                                                                                                                                                                                                                                                                                                                                                                                             | 106     |
| 18  | ('gs 1101' OR 'cal 101' OR cal101 OR 'gs 1101' OR gs1101 OR idelalisib): ab,ti,kw                                                                                                                                                                                                                                                                                                                                                                                                                                                                                                                                                                                                                                                                                | 2       |
| 19  | (obinutuzumab OR afutuzumab OR 'ga 101' OR ga101 OR r 7159 OR r7159 OR 'ro 5072759' OR ro5072759): ab,ti,kw                                                                                                                                                                                                                                                                                                                                                                                                                                                                                                                                                                                                                                                      | 12      |
| 20  | MeSH descriptor: [Cyclophosphamide] explode all trees                                                                                                                                                                                                                                                                                                                                                                                                                                                                                                                                                                                                                                                                                                            | 3719    |
| 21  | (cyclophosphamide OR carloxan OR ciclofosfamida OR ciclolen OR ciclofal OR clafen OR cyclo-cell OR cycloblastin OR cycloblastine OR 'cyclofos amide' OR cyclofosamid OR cyclofosfamide OR cyclophar OR cyclophosphamid OR 'cyclophosphamide isopac' OR cyclophosphamides OR cyclophosphan OR cyclophosphane OR cyclostin OR cyclostin n OR cycloxan OR cyphos OR cytophosphan OR cytophosphane OR cytoxan OR 'cytoxan lyophilized' OR 'endocyclo phosphate' OR endoxan OR endoxan-asta OR 'endoxan asta' OR endoxana OR endoxon-asta OR enduxan OR genoxal OR ledoxan OR ledoxina OR 'lyophilized cytoxan' OR mitoxan OR neosan OR neosar OR noristan OR 'nsc 26271' OR 'nsc 2671' OR procytox OR procytoxide OR semdoxan OR sendoxan OR syklofosamid): ab,ti,kw | 6416    |
| 22  | cop NEAR/2 regimen                                                                                                                                                                                                                                                                                                                                                                                                                                                                                                                                                                                                                                                                                                                                               | 21      |
| 23  | chop NEAR/2 regimen                                                                                                                                                                                                                                                                                                                                                                                                                                                                                                                                                                                                                                                                                                                                              | 120     |
| 24  | OR/8-23                                                                                                                                                                                                                                                                                                                                                                                                                                                                                                                                                                                                                                                                                                                                                          | 8002    |
| 25  | #7 and #24 from 1992 to 2013, in Cochrane Reviews (Reviews and Protocols), Other Reviews and Trials                                                                                                                                                                                                                                                                                                                                                                                                                                                                                                                                                                                                                                                              | 403     |

**Table S3** Search strategy for clinical review in MEDLINE®-In Process (searched through PubMed.com interface on February 27, 2013)

| No | Query                                                                                                                                                                                                                                                                                                                                                                                                                                                                                                                                                                                                                                                                                                                                                    | Results |
|----|----------------------------------------------------------------------------------------------------------------------------------------------------------------------------------------------------------------------------------------------------------------------------------------------------------------------------------------------------------------------------------------------------------------------------------------------------------------------------------------------------------------------------------------------------------------------------------------------------------------------------------------------------------------------------------------------------------------------------------------------------------|---------|
| 1  | "Leukemia, Lymphocytic, Chronic, B-Cell"[Mesh terms]                                                                                                                                                                                                                                                                                                                                                                                                                                                                                                                                                                                                                                                                                                     | 10 777  |
| 2  | "chronic lymphocytic leukaemia"[All Fields] OR ("leukemia"[All Fields] AND "lymphocytic"[All Fields] AND "chronic"[All Fields] AND "b-cell"[All Fields]) OR "b-cell chronic lymphocytic leukemia"[All Fields] OR ("chronic"[All Fields] AND "lymphocytic"[All Fields] AND "leukemia"[All Fields]) OR "chronic lymphocytic leukemia"[All Fields]                                                                                                                                                                                                                                                                                                                                                                                                          | 17 425  |
| 3  | Search (#1 or #2)                                                                                                                                                                                                                                                                                                                                                                                                                                                                                                                                                                                                                                                                                                                                        | 17 425  |
| 4  | (chlorambucil OR amboclorin OR 'cb 1348' OR cb1348 OR chlorambacil OR chloraminophene OR chlorbutin OR chloroambucil OR chorambucil OR ecloril OR leuceran OR leukeran OR linfolysin OR lympholysin OR nsc 3088 OR nsc3088)                                                                                                                                                                                                                                                                                                                                                                                                                                                                                                                              | 4570    |
| 5  | (fludarabine OR fludara)                                                                                                                                                                                                                                                                                                                                                                                                                                                                                                                                                                                                                                                                                                                                 | 3988    |
| 6  | (cladribine OR biodribin OR ntocel OR leustat OR leustatin OR leustatine OR litak OR litax OR movectro OR mylinax OR 'rwj 26251' OR rwj26251)                                                                                                                                                                                                                                                                                                                                                                                                                                                                                                                                                                                                            | 1886    |
| 7  | (bendamustine OR 'cimet 3393' OR cytotasan OR cytotasan r OR cytotasane OR 'imet 3393' OR levact OR ribomustin OR treanda)                                                                                                                                                                                                                                                                                                                                                                                                                                                                                                                                                                                                                               | 529     |
| 8  | (alemtuzumab OR campath OR 'ldp 103' OR 'ldp103' OR lemtrada OR mabcampath)                                                                                                                                                                                                                                                                                                                                                                                                                                                                                                                                                                                                                                                                              | 2066    |
| 9  | (rituximab OR 'idec c2b8' OR mabthera OR reditux OR rituxan OR rituxin)                                                                                                                                                                                                                                                                                                                                                                                                                                                                                                                                                                                                                                                                                  | 10 846  |
| 10 | (ofatumumab OR arzerra OR 'gsk 1841157' OR gsk1841157 OR 'humac CD20' OR HuMax-CD20 OR 'HuMax CD20' OR HuMaxCD20)                                                                                                                                                                                                                                                                                                                                                                                                                                                                                                                                                                                                                                        | 6980    |
| 11 | (lenalidomide OR 'cc 5013' OR cc5013 OR 'cdc 501' OR cdc 5013 OR cdc501 OR cdc5013 OR 'enmd 0997' OR enmd0997 OR 'imid 3' OR imid3 OR revimid OR revlimid)                                                                                                                                                                                                                                                                                                                                                                                                                                                                                                                                                                                               | 1729    |
| 12 | ('gs 1101' OR 'cal 101' OR cal101 OR 'gs 1101' OR gs1101 OR idelalisib)                                                                                                                                                                                                                                                                                                                                                                                                                                                                                                                                                                                                                                                                                  | 35      |
| 13 | (obinutuzumab OR afutuzumab OR 'ga 101' OR ga101 OR r 7159 OR r7159 OR 'ro 5072759' OR ro5072759)                                                                                                                                                                                                                                                                                                                                                                                                                                                                                                                                                                                                                                                        | 49      |
| 14 | (cyclophosphamide OR carloxan OR ciclofosfamida OR ciclolen OR ciclofal OR clafen OR cyclo-cell OR cycloblastin OR cycloblastine OR 'cyclofos amide' OR cyclofosfamid OR cyclofosfamide OR cyclophar OR cyclophosphamid OR 'cyclophosphamide isopac' OR cyclophosphamides OR cyclophosphan OR cyclophosphane OR cyclostin OR cyclostin n OR cyclofan OR cyphos OR cytophosphan OR cytophosphane OR cytofan OR 'cytofan lyophilized' OR 'endocyclo phosphate' OR endoxan OR endoxan-asta OR 'endoxan asta' OR endoxana OR endoxon-asta OR enduxan OR genoxal OR ledoxan OR ledoxina OR 'lyophilized cytofan' OR mitoxan OR neosan OR neosar OR noristan OR 'nsc 26271' OR 'nsc 2671' OR procytox OR procytoxide OR semdoxan OR sendoxan OR syklofosfamid) | 496 503 |
| 15 | "cop regimen"                                                                                                                                                                                                                                                                                                                                                                                                                                                                                                                                                                                                                                                                                                                                            | 43      |
| 16 | "chop regimen"                                                                                                                                                                                                                                                                                                                                                                                                                                                                                                                                                                                                                                                                                                                                           | 340     |
| 17 | OR/4-16                                                                                                                                                                                                                                                                                                                                                                                                                                                                                                                                                                                                                                                                                                                                                  | 527 769 |
| 18 | Search (#3 AND #17)                                                                                                                                                                                                                                                                                                                                                                                                                                                                                                                                                                                                                                                                                                                                      | 3955    |
| 19 | Search (#18 AND (in process[sb] OR pubstatusaheadofprint))                                                                                                                                                                                                                                                                                                                                                                                                                                                                                                                                                                                                                                                                                               | 98      |

## B: Systematic Literature Search and Screening Process for Trials

Fig. S1 Original systematic review conducted in February, 2013

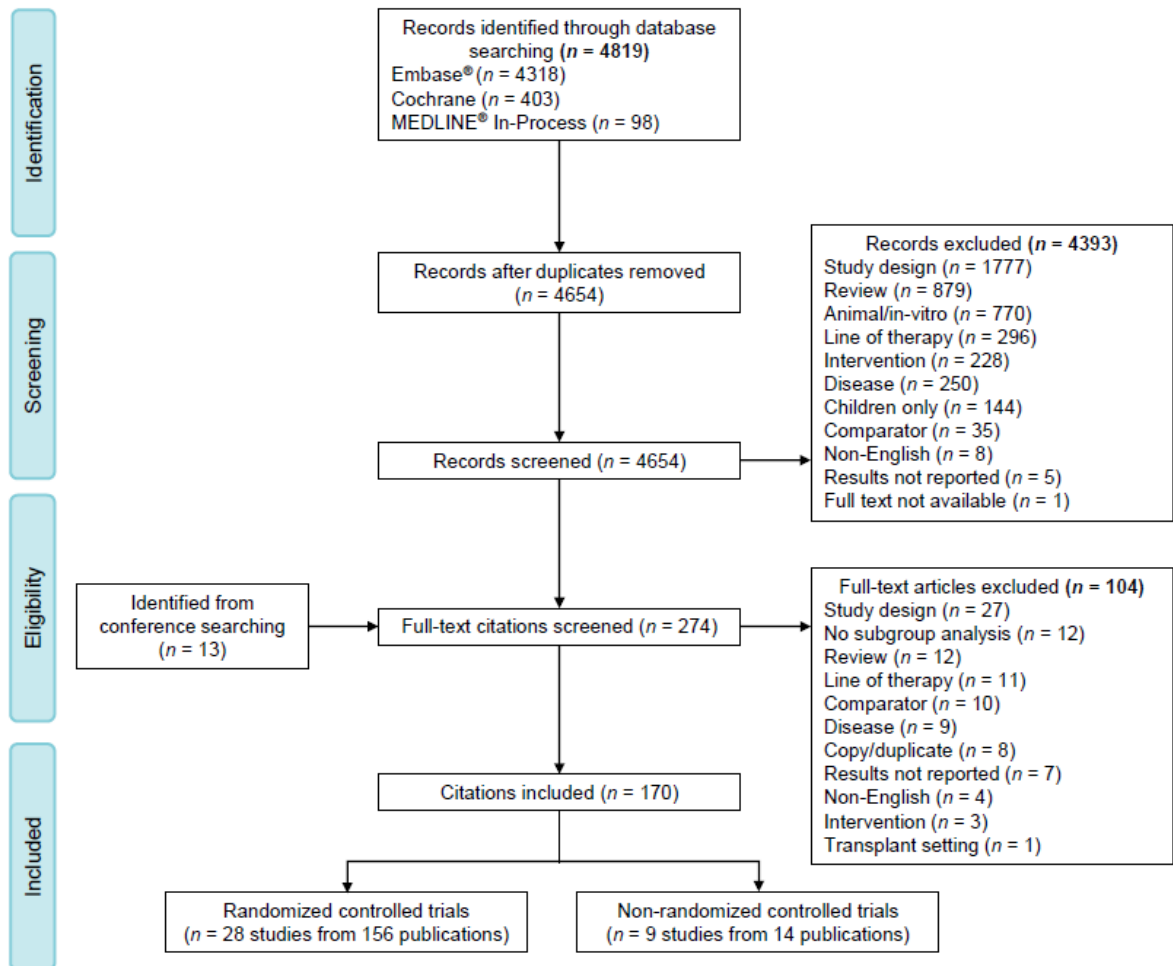

**Fig. S2** First update of original systematic review conducted in April, 2014

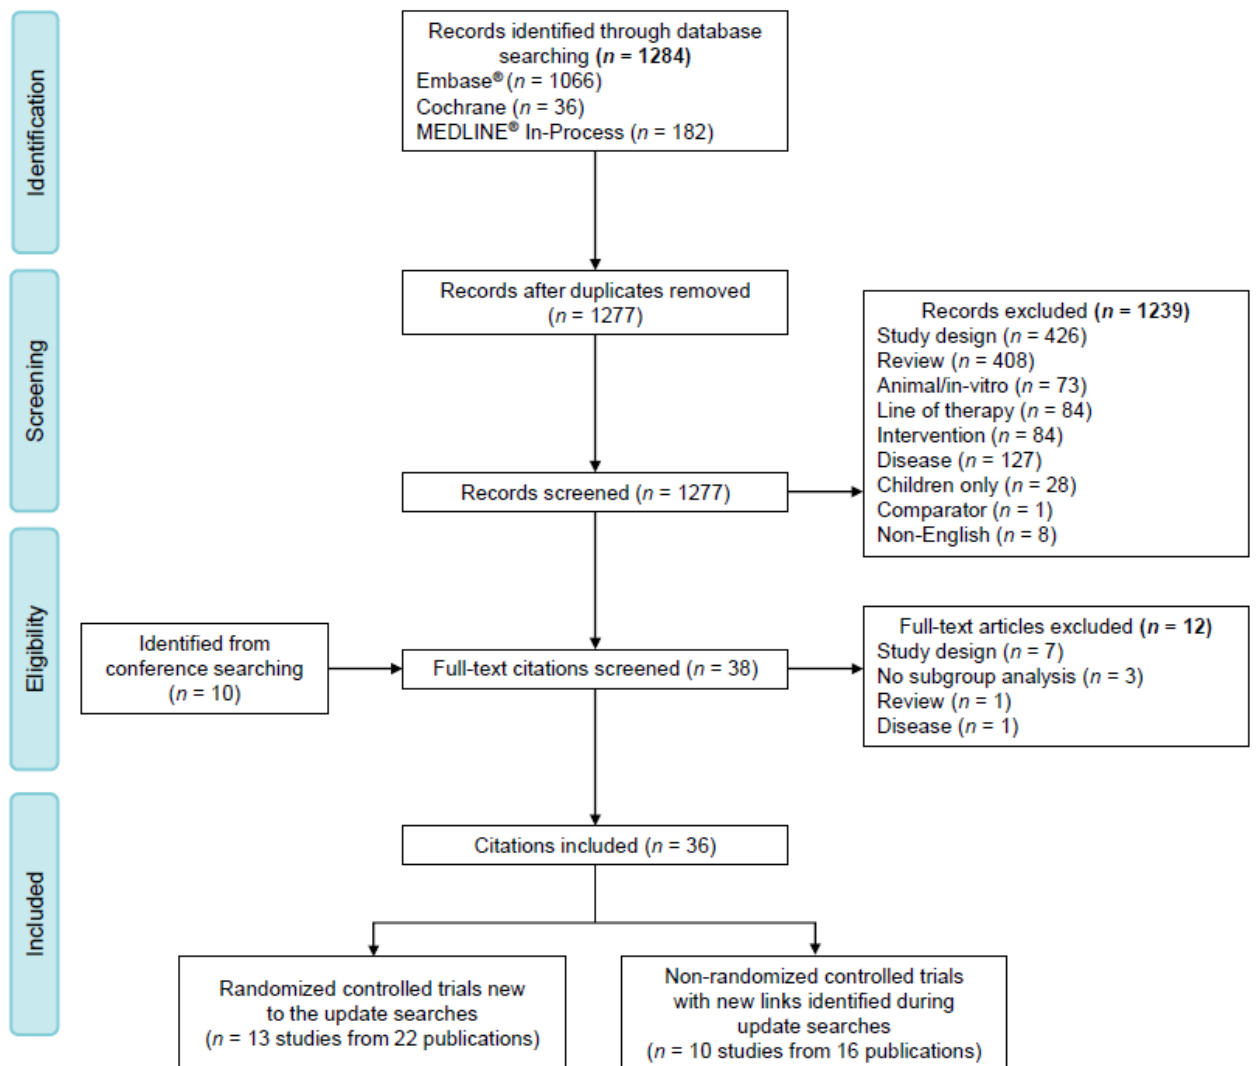



**Fig. S3** Second update of original systematic review conducted in August, 2015

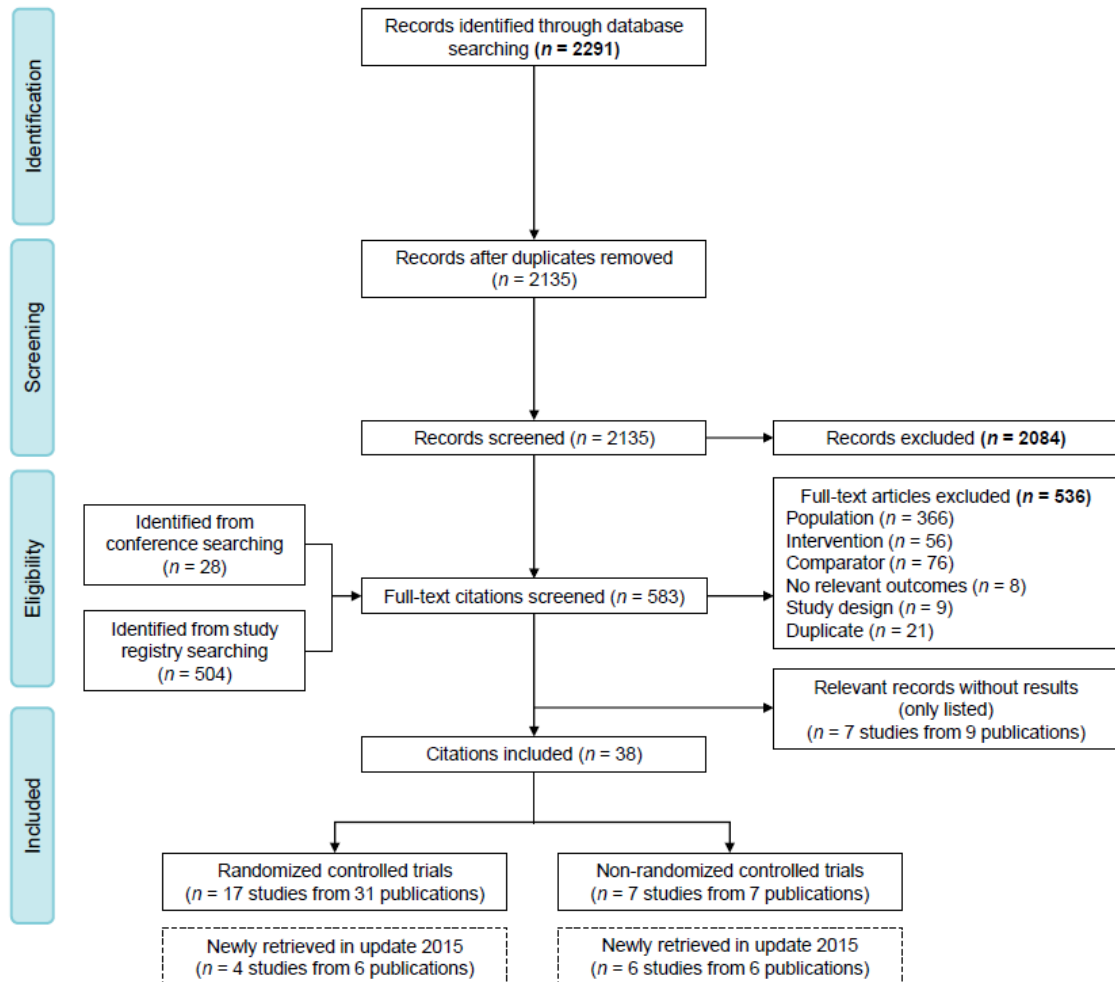

## C: BUGS Code Used for the Network Meta-Analysis

This section presents BUGS code used for the network meta-analysis (NMA). It is based on the code published by Dias et al [1]. All analyses were performed using the computing environment R. The R package 'R2jags' was used for Markov Chain Monte Carlo simulations.

### Fixed-Effects NMA Model

```
# Normal likelihood, identity link, trial-level data given as treatment differences
# Fixed effects model for multi-arm trials

model{      # *** PROGRAM STARTS

  for(i in 1:ns2) {      # LOOP THROUGH 2-ARM STUDIES
    y[i,2] ~ dnorm(delta[i,2],prec[i,2]) # normal likelihood for 2-arm trials
    #Deviance contribution for trial i
    resdev[i] <- (y[i,2]-delta[i,2])*(y[i,2]-delta[i,2])*prec[i,2]
  }

  for(i in (ns2+1):(ns2+ns3)) {      # LOOP THROUGH THREE-ARM STUDIES
    for (k in 1:(na[i]-1)) { # set variance-covariance matrix
      for (j in 1:(na[i]-1)) {
        Sigma[i,j,k] <- V[i]* (1-equals(j,k)) + va[i,k+1]*equals(j,k)
      }
    }
    Omega[i,1:(na[i]-1),1:(na[i]-1)] <- inverse(Sigma[i,,]) #Precision matrix
    # multivariate normal likelihood for 3-arm trials
    y[i,2:na[i]] ~ dmnorm(delta[i,2:na[i]],Omega[i,1:(na[i]-1),1:(na[i]-1)])
    #Deviance contribution for trial i
    for (k in 1:(na[i]-1)){ # multiply vector & matrix
```

```

ydiff[i,k]<- y[i,(k+1)] - delta[i,(k+1)]
z[i,k]<- inprod(Omega[i,k,1:(na[i]-1)], ydiff[i,1:(na[i]-1)])
}
resdev[i]<- inprod(ydiff[i,1:(na[i]-1)], z[i,1:(na[i]-1)])
}
for(i in 1:(ns2+ns3)){          # LOOP THROUGH ALL STUDIES
  for (k in 2:na[i]) {        # LOOP THROUGH ARMS
    va[i,k] <- pow(se[i,k],2) # calculate variances
    prec[i,k] <- 1/va[i,k]    # set precisions
    delta[i,k] <- d[t[i,k]] - d[t[i,1]]
  }
}
totresdev <- sum(resdev[])      #Total Residual Deviance
d[1]<-0    # treatment effect is zero for reference treatment
# vague priors for treatment effects
for (k in 2:nt){ d[k] ~ dnorm(0,.0001) }

sd<-0 #between-trial variation is zero (fixed-effects model)
B<-0 #no meta-regression

} # *** PROGRAM ENDS

```

## Random-Effects NMA Model (with Half-Normal Prior for the Heterogeneity Parameter)

```
# Normal likelihood, identity link, trial-level data given as treatment differences
# Random effects model for multi-arm trials
# Half-normal prior on heterogeneity parameter

model{
    # *** PROGRAM STARTS
    for(i in 1:ns2) {
        #LOOP THROUGH 2-ARM STUDIES
        y[i,2] ~ dnorm(delta[i,2],prec[i,2]) # normal likelihood for 2-arm trials
        resdev[i] <- (y[i,2]-delta[i,2])*(y[i,2]-delta[i,2])*prec[i,2] #Deviance contribution for trial i
    }
    for(i in (ns2+1):(ns2+ns3)) {
        # LOOP THROUGH THREE-ARM STUDIES
        for (k in 1:(na[i]-1)) {
            # set variance-covariance matrix
            for (j in 1:(na[i]-1)) {
                Sigma[i,j,k] <- V[i]*(1-equals(j,k)) + va[i,k+1]*equals(j,k)
            }
        }
        Omega[i,1:(na[i]-1),1:(na[i]-1)] <- inverse(Sigma[i,,]) #Precision matrix
        # multivariate normal likelihood for 3-arm trials
        y[i,2:na[i]] ~ dmnorm(delta[i,2:na[i]],Omega[i,1:(na[i]-1),1:(na[i]-1)])
        #Deviance contribution for trial i
        for (k in 1:(na[i]-1)){ # multiply vector & matrix
            ydiff[i,k]<- y[i,(k+1)] - delta[i,(k+1)]
            z[i,k]<- inprod(Omega[i,k,1:(na[i]-1)], ydiff[i,1:(na[i]-1)])
        }
        resdev[i]<- inprod(ydiff[i,1:(na[i]-1)], z[i,1:(na[i]-1)])
    }

    for(i in 1:(ns2+ns3)){
        # LOOP THROUGH ALL STUDIES
        w[i,1] <- 0 # adjustment for multi-arm trials is zero for control arm
    }
}
```

```

delta[i,1] <- 0      # treatment effect is zero for control arm
for (k in 2:na[i]) {      # LOOP THROUGH ARMS
  va[i,k] <- pow(se[i,k],2) # calculate variances
  prec[i,k] <- 1/va[i,k]   # set precisions
}
for (k in 2:na[i]) {      # LOOP THROUGH ARMS
  # trial-specific LOR distributions
  delta[i,k] ~ dnorm(md[i,k],taud[i,k])
  # mean of random effects distributions, with multi-arm trial correction
  md[i,k] <- d[t[i,k]] - d[t[i,1]] + sw[i,k]
  # precision of random effects distributions (with multi-arm trial correction)
  taud[i,k] <- tau *2*(k-1)/k
  # adjustment, multi-arm RCTs
  w[i,k] <- (delta[i,k] - d[t[i,k]] + d[t[i,1]])
  # cumulative adjustment for multi-arm trials
  sw[i,k] <- sum(w[i,1:k-1])/(k-1)
}
}
totresdev <- sum(resdev[])      #Total Residual Deviance
d[1]<-0      # treatment effect is zero for reference treatment
# vague priors for treatment effects
for (k in 2:nt){ d[k] ~ dnorm(0,.0001) }
sd~dnorm(0,prec2)|(0,1.0E8) # half-normal prior for heterogeneity parameter
prec2<-pow(sig,-2)
tau <- pow(sd,-2) # between-trial precision = (1/between-trial variance)

B<-0 #no meta-regression

}      # *** PROGRAM ENDS

```

**D: Summary of Results for the Main Analysis and Additional Analysis Using the Random Effects, with Informative Prior, Model**

**Table S4** Main analysis: treatment ranking for PFS and OS. Analysis excludes studies Knauf, Cam307, and Calgb\_9011 (expert recommendation)

|            | Random effects model, informative prior |                   |
|------------|-----------------------------------------|-------------------|
|            | Probability best                        | Median rank (CrI) |
| <b>PFS</b> |                                         |                   |
| G-Clb      | 0.53                                    | 1 (1, 3)          |
| RFC-lite   | 0.3                                     | 2 (1, 3)          |
| R-Benda    | 0.17                                    | 3 (1, 3)          |
| R-Clb      | 0                                       | 4 (4, 5)          |
| O-Clb      | 0                                       | 5 (4, 6)          |
| F          | 0                                       | 6 (5,7)           |
| Clb        | 0                                       | 7 (6, 7)          |
| <b>OS</b>  |                                         |                   |
| G-Clb      | 0.55                                    | 1 (1, 4)          |
| R-Benda    | 0.25                                    | 3 (1, 6)          |
| R-Clb      | 0.08                                    | 3 (1, 5)          |
| O-Clb      | 0.02                                    | 4 (2, 6)          |
| Clb        | 0                                       | 5 (3, 6)          |
| F          | 0.09                                    | 6 (1, 6)          |

*Clb* chlorambucil, *CrI* credible interval, *F* fludarabine, *G-Clb* obinutuzumab + chlorambucil, *O-Clb* ofatumumab + chlorambucil, *OS* overall survival, *PFS* progression-free survival, *R-Benda* rituximab + bendamustine, *R-Clb* rituximab + chlorambucil, *RFC* rituximab + fludarabine + cyclophosphamide

**Table S5** Additional analysis: treatment ranking for PFS and OS. Studies Knauf, Cam307, and Calgb\_9011 included in analysis

|            | Random effects model, informative prior |                   |
|------------|-----------------------------------------|-------------------|
|            | Probability best                        | Median rank (CrI) |
| <b>PFS</b> |                                         |                   |
| G-Clb      | 0.51                                    | 1 (1, 3)          |
| RFC-Lite   | 0.31                                    | 2 (1, 4)          |
| R-Benda    | 0.17                                    | 3 (1, 4)          |
| Benda      | 0.01                                    | 4 (2, 6)          |
| R-Clb      | 0                                       | 5 (4, 7)          |
| O-Clb      | 0                                       | 6 (4, 8)          |
| Alm        | 0                                       | 7 (4, 8)          |
| F          | 0                                       | 8 (6, 9)          |
| Clb        | 0                                       | 9 (8, 9)          |
| <b>OS</b>  |                                         |                   |
| G-Clb      | 0.57                                    | 1 (1, 4)          |
| R-Benda    | 0.28                                    | 3 (1, 7)          |
| R-Clb      | 0.08                                    | 3 (1, 6)          |
| Benda      | 0.05                                    | 4 (1, 7)          |
| O-Clb      | 0.02                                    | 5 (2, 7)          |
| F          | 0.01                                    | 5 (2, 7)          |
| Clb        | 0                                       | 6 (4, 7)          |

*Alm* alemtuzumab, *Benda* bendamustine, *Clb* chlorambucil, *CrI* credible interval, *F* fludarabine, *G-Clb* obinutuzumab + chlorambucil, *O-Clb* ofatumumab + chlorambucil, *OS* overall survival, *PFS* progression-free survival, *R-Benda* rituximab + bendamustine, *R-Clb* rituximab + chlorambucil, *RFC* rituximab + fludarabine + cyclophosphamide

**Fig. S4** Main analysis (Knauf, Cam307, and Calgb\_9011 excluded): effect of interventional treatments on PFS and OS using a random effects, with informative prior, model. Forest plots show relative effect of each treatment on PFS and OS as compared with the reference combination treatment G-Clb. Median HRs and CrIs are shown.

*Clb* chlorambucil, *CrI* credible interval, *F* fludarabine, *G-Clb* obinutuzumab + chlorambucil, *HR* hazard ratio, *O-Clb* ofatumumab + chlorambucil, *OS* overall survival, *PFS* progression-free survival, *R-Benda* rituximab + bendamustine, *R-Clb* rituximab + chlorambucil, *RE* random effects, *RFC* rituximab + fludarabine + cyclophosphamide

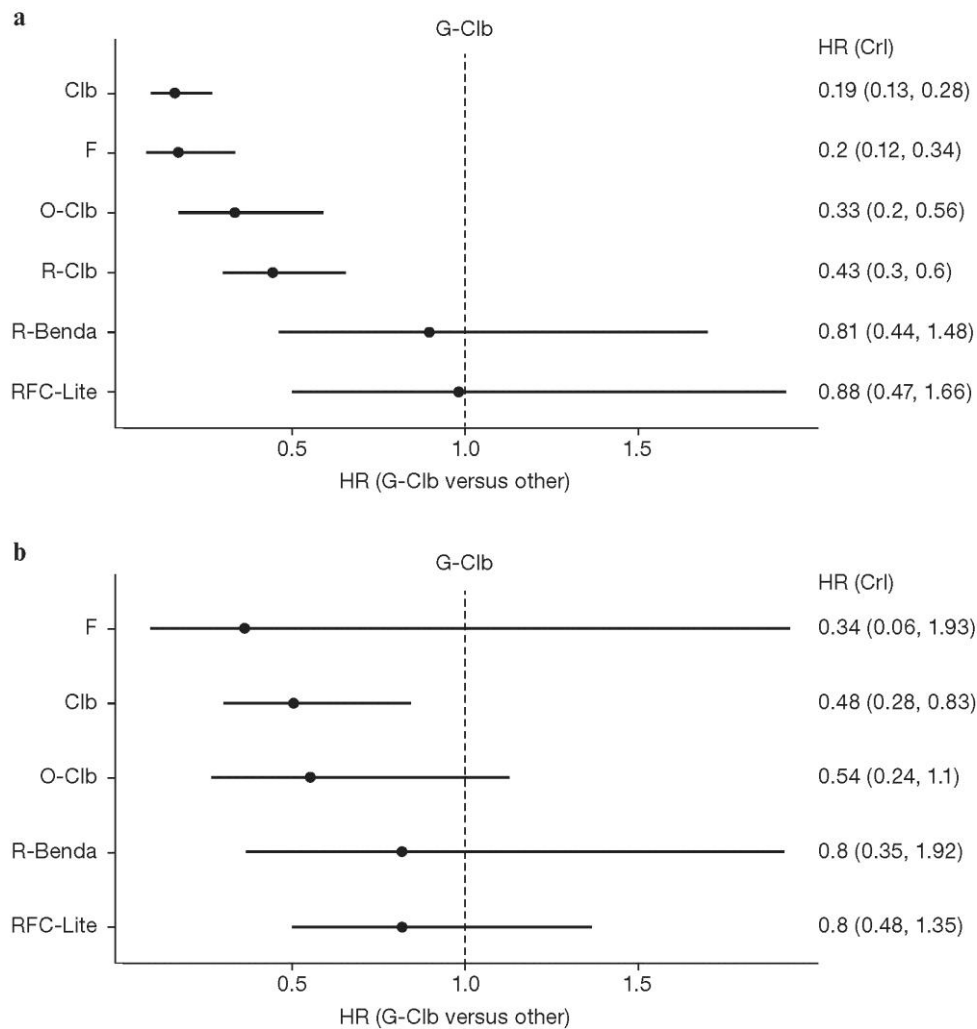



**Fig. S5** Additional analysis (Knauf, Cam307, and Calgb\_9011 included): effect of interventional treatments on PFS and OS using a random effects, with informative prior, model. Forest plots show relative effect of each treatment on PFS and OS as compared with the reference combination treatment G-Clb. Median HRs and Crls are shown.

*Alm* alemtuzumab, *Benda* bendamustine, *Clb* chlorambucil, *Crl* credible interval, *F* fludarabine, *G-Clb* obinutuzumab + chlorambucil, *HR* hazard ratio, *O-Clb* ofatumumab + chlorambucil, *OS* overall survival, *PFS* progression-free survival, *R-Benda* rituximab + bendamustine, *R-Clb* rituximab + chlorambucil, *RE* random effects, *RFC* rituximab + fludarabine + cyclophosphamide

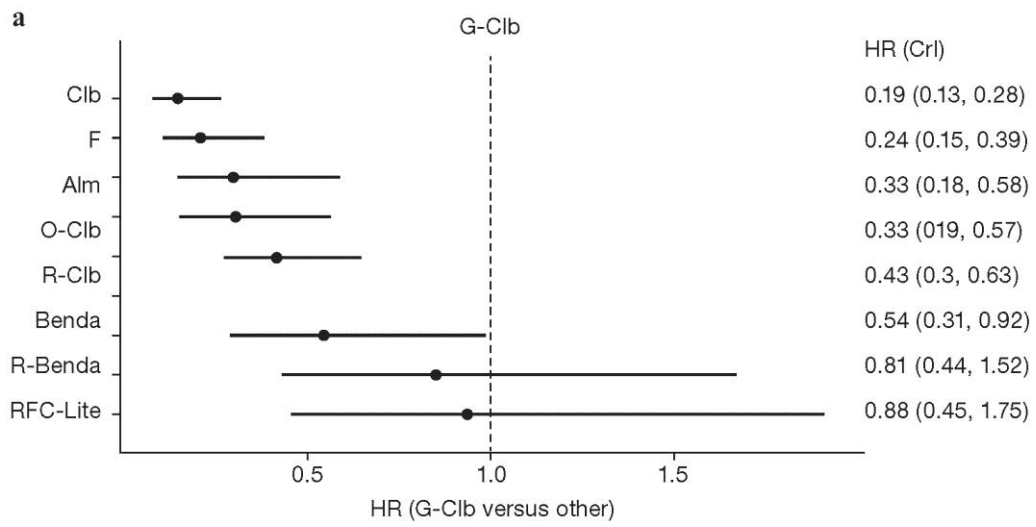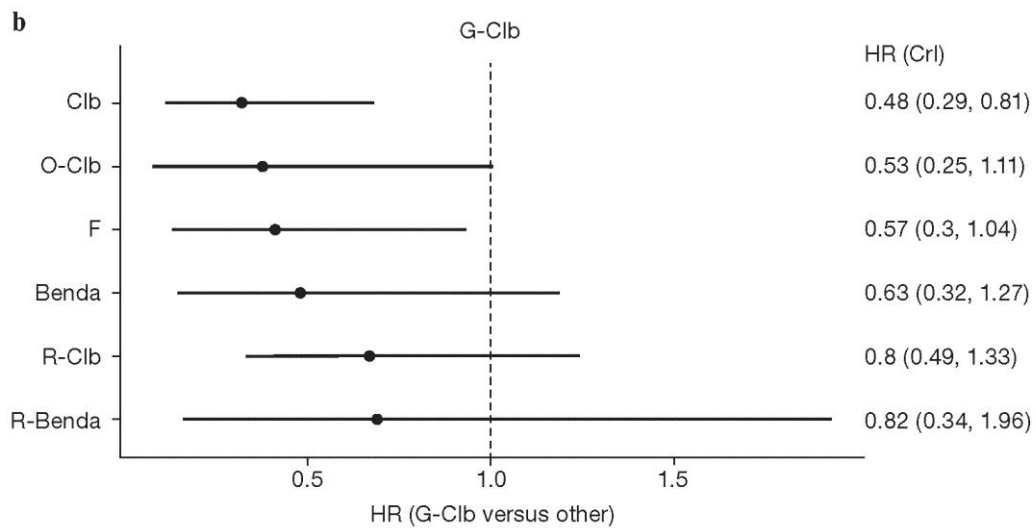

### E: Summary of Hazard Ratios for all Pairwise Comparisons

**Table S6** Main analysis: summary of HRs and Crls for PFS for all pairwise comparisons using a fixed effects and random effects, with informative prior, model

|                                               | HR (Crls)         |                   |                   |                   |                   |                   |                   |
|-----------------------------------------------|-------------------|-------------------|-------------------|-------------------|-------------------|-------------------|-------------------|
|                                               | Clb               | R-Clb             | O-Clb             | F                 | RFC-Lite          | R-Benda           | G-Clb             |
| Fixed effects model                           |                   |                   |                   |                   |                   |                   |                   |
| Clb                                           | 1 (1, 1)          | 2.25 (1.76, 2.91) | 1.75 (1.38, 2.21) | 1.05 (0.78, 1.43) | 4.64 (2.69, 8.06) | 4.26 (2.56, 7.11) | 5.27 (3.94, 7.03) |
| R-Clb                                         | 0.44 (0.34, 0.57) | 1 (1, 1)          | 0.78 (0.55, 1.09) | 0.47 (0.32, 0.69) | 2.07 (1.26, 3.35) | 1.89 (1.21, 2.93) | 2.33 (1.84, 2.95) |
| O-Clb                                         | 0.57 (0.45, 0.72) | 1.29 (0.92, 1.83) | 1 (1, 1)          | 0.6 (0.41, 0.89)  | 2.66 (1.44, 4.9)  | 2.42 (1.4, 4.29)  | 3.01 (2.06, 4.39) |
| F                                             | 0.95 (0.7, 1.28)  | 2.15 (1.44, 3.16) | 1.67 (1.12, 2.43) | 1 (1, 1)          | 4.41 (2.34, 8.23) | 4.05 (2.23, 7.28) | 5.01 (3.27, 7.55) |
| RFC-Lite                                      | 0.22 (0.12, 0.37) | 0.48 (0.3, 0.79)  | 0.38 (0.2, 0.69)  | 0.23 (0.12, 0.43) | 1 (1, 1)          | 0.92 (0.48, 1.77) | 1.13 (0.66, 1.97) |
| R-Benda                                       | 0.23 (0.14, 0.39) | 0.53 (0.34, 0.83) | 0.41 (0.23, 0.71) | 0.25 (0.14, 0.45) | 1.09 (0.57, 2.09) | 1 (1, 1)          | 1.24 (0.75, 2.03) |
| G-Clb                                         | 0.19 (0.14, 0.25) | 0.43 (0.34, 0.54) | 0.33 (0.23, 0.49) | 0.2 (0.13, 0.31)  | 0.88 (0.51, 1.52) | 0.81 (0.49, 1.33) | 1 (1, 1)          |
| Random effects, with informative prior, model |                   |                   |                   |                   |                   |                   |                   |
| Clb                                           | 1 (1, 1)          | 2.26 (1.56, 3.24) | 1.76 (1.25, 2.49) | 1.05 (0.71, 1.58) | 4.62 (2.46, 9.12) | 4.26 (2.27, 7.88) | 5.28 (3.59, 7.74) |
| R-Clb                                         | 0.44 (0.31, 0.64) | 1 (1, 1)          | 0.78 (0.48, 1.3)  | 0.46 (0.27, 0.79) | 2.05 (1.2, 3.62)  | 1.89 (1.14, 3.1)  | 2.34 (1.66, 3.29) |
| O-Clb                                         | 0.57 (0.4, 0.8)   | 1.29 (0.77, 2.07) | 1 (1, 1)          | 0.6 (0.35, 1.02)  | 2.63 (1.26, 5.55) | 2.42 (1.17, 4.94) | 2.99 (1.8, 5.04)  |
| F                                             | 0.95 (0.63, 1.42) | 2.15 (1.27, 3.64) | 1.68 (0.98, 2.86) | 1 (1, 1)          | 4.42 (2.08, 9.5)  | 4.05 (1.91, 8.39) | 5.03 (2.92, 8.5)  |
| RFC-Lite                                      | 0.22 (0.11, 0.41) | 0.49 (0.28, 0.84) | 0.38 (0.18, 0.79) | 0.23 (0.11, 0.48) | 1 (1, 1)          | 0.92 (0.44, 1.91) | 1.14 (0.6, 2.11)  |

|         |                   |                   |                  |                   |                   |                   |                   |
|---------|-------------------|-------------------|------------------|-------------------|-------------------|-------------------|-------------------|
| R-Benda | 0.23 (0.13, 0.44) | 0.53 (0.32, 0.88) | 0.41 (0.2, 0.85) | 0.25 (0.12, 0.52) | 1.09 (0.52, 2.29) | 1 (1, 1)          | 1.24 (0.68, 2.27) |
| G-Clb   | 0.19 (0.13, 0.28) | 0.43 (0.3, 0.6)   | 0.33 (0.2, 0.56) | 0.2 (0.12, 0.34)  | 0.88 (0.47, 1.66) | 0.81 (0.44, 1.48) | 1 (1, 1)          |

---

*Clb* chlorambucil, *CrI* credible interval, *F* fludarabine, *G-Clb* obinutuzumab + chlorambucil, *HR* hazard ratio, *O-Clb* ofatumumab + chlorambucil, *PFS* progression-free survival, *R-Benda* rituximab + bendamustine, *R-Clb* rituximab + chlorambucil, *RFC* rituximab + fludarabine + cyclophosphamide

**Table S7** Main analysis: summary of HRs and Crls for overall survival for all pairwise comparisons using a fixed effects and random effects, with informative prior, model

|                                               | HR (Crl)          |                    |                   |                   |                    |                    |
|-----------------------------------------------|-------------------|--------------------|-------------------|-------------------|--------------------|--------------------|
|                                               | Clb               | R-Clb              | O-Clb             | F                 | R-Benda            | G-Clb              |
| Fixed effects model                           |                   |                    |                   |                   |                    |                    |
| Clb                                           | 1 (1, 1)          | 1.67 (1.07, 2.64)  | 1.1 (0.7, 1.72)   | 0.73 (0.16, 3.58) | 1.67 (0.75, 3.73)  | 2.07 (1.29, 3.3)   |
| R-Clb                                         | 0.6 (0.38, 0.94)  | 1 (1, 1)           | 0.66 (0.34, 1.25) | 0.44 (0.09, 2.32) | 1 (0.52, 1.93)     | 1.23 (0.8, 1.92)   |
| O-Clb                                         | 0.91 (0.58, 1.44) | 1.52 (0.8, 2.9)    | 1 (1, 1)          | 0.66 (0.13, 3.54) | 1.53 (0.61, 3.8)   | 1.88 (0.96, 3.56)  |
| F                                             | 1.37 (0.28, 6.45) | 2.29 (0.43, 11.33) | 1.51 (0.28, 7.57) | 1 (1, 1)          | 2.31 (0.39, 12.85) | 2.85 (0.54, 14.24) |
| R-Benda                                       | 0.6 (0.27, 1.32)  | 1 (0.52, 1.91)     | 0.65 (0.26, 1.65) | 0.43 (0.08, 2.57) | 1 (1, 1)           | 1.23 (0.56, 2.71)  |
| G-Clb                                         | 0.48 (0.3, 0.78)  | 0.81 (0.52, 1.26)  | 0.53 (0.28, 1.04) | 0.35 (0.07, 1.86) | 0.81 (0.37, 1.78)  | 1 (1, 1)           |
| Random effects, with informative prior, model |                   |                    |                   |                   |                    |                    |
| Clb                                           | 1 (1, 1)          | 1.67 (2.74)        | 1.1 (0.64, 1.86)  | 0.72 (0.14, 3.6)  | 1.67 (0.69, 3.87)  | 2.07 (1.21, 3.52)  |
| R-Clb                                         | 0.6 (0.36, 1)     | 1 (1, 1)           | 0.66 (0.31, 1.4)  | 0.43 (0.08, 2.34) | 1 (0.5, 2.01)      | 1.24 (0.74, 2.06)  |
| O-Clb                                         | 0.91 (0.54, 1.56) | 1.52 (0.72, 3.24)  | 1 (1, 1)          | 0.66 (0.12, 3.46) | 1.51 (0.55, 4.19)  | 1.87 (0.9, 4.11)   |
| F                                             | 1.39 (0.28, 7.07) | 2.33 (0.43, 12.03) | 1.51 (0.29, 8.57) | 1 (1, 1)          | 2.32 (0.37, 14.23) | 2.9 (0.52, 15.4)   |
| R-Benda                                       | 0.6 (0.26, 1.45)  | 1 (0.5, 1.99)      | 0.66 (0.24, 1.81) | 0.43 (0.07, 2.69) | 1 (1, 1)           | 1.25 (0.52, 2.89)  |
| G-Clb                                         | 0.48 (0.28, 0.83) | 0.8 (0.48, 1.35)   | 0.54 (0.24, 1.11) | 0.34 (0.06, 1.93) | 0.8 (0.35, 1.92)   | 1 (1, 1)           |

Clb chlorambucil, Crl credible interval, F fludarabine, G-Clb obinutuzumab + chlorambucil, HR hazard ratio, O-Clb ofatumumab + chlorambucil, R-Benda rituximab + bendamustine, R-Clb rituximab + chlorambucil

**Table S8** Additional analysis: summary of HRs and CrIs for progression-free survival for all pairwise comparisons using a fixed effects and random effects, with informative prior, model

|                     |                     | HR (CrIs)           |                     |                     |                     |                     |                     |                     |                     |  |
|---------------------|---------------------|---------------------|---------------------|---------------------|---------------------|---------------------|---------------------|---------------------|---------------------|--|
|                     | Clb                 | R-Clb               | Benda               | O-Clb               | F                   | Alm                 | RFC-Lite            | R-Benda             | G-Clb               |  |
| Fixed effects model |                     |                     |                     |                     |                     |                     |                     |                     |                     |  |
| Clb                 | 1<br>(1,1)          | 2.26<br>(1.76,2.9)  | 2.82<br>(2.14,3.71) | 1.76<br>(1.37,2.23) | 1.31<br>(1.1,1.57)  | 1.73<br>(1.28,2.31) | 4.64<br>(2.67,8.26) | 4.27<br>(2.58,7.21) | 5.27<br>(3.97,6.99) |  |
| R-Clb               | 0.44<br>(0.34,0.57) | 1<br>(1,1)          | 1.25<br>(0.87,1.8)  | 0.78<br>(0.55,1.1)  | 0.58<br>(0.43,0.79) | 0.76<br>(0.52,1.11) | 2.06<br>(1.26,3.4)  | 1.89<br>(1.23,2.91) | 2.33<br>(1.84,2.97) |  |
| Benda               | 0.35<br>(0.27,0.47) | 0.8<br>(0.55,1.16)  | 1<br>(1,1)          | 0.62<br>(0.43,0.9)  | 0.46<br>(0.34,0.64) | 0.61<br>(0.41,0.91) | 1.65<br>(0.9,3.08)  | 1.51<br>(0.85,2.69) | 1.87<br>(1.26,2.78) |  |
| O-Clb               | 0.57<br>(0.45,0.73) | 1.29<br>(0.91,1.81) | 1.6<br>(1.11,2.31)  | 1<br>(1,1)          | 0.74<br>(0.55,1.01) | 0.98<br>(0.66,1.43) | 2.64<br>(1.45,4.9)  | 2.43<br>(1.41,4.26) | 3.01<br>(2.05,4.35) |  |
| F                   | 0.76<br>(0.64,0.91) | 1.73<br>(1.27,2.34) | 2.15<br>(1.55,2.97) | 1.34<br>(0.99,1.82) | 1<br>(1,1)          | 1.32<br>(0.94,1.84) | 3.55<br>(1.99,6.42) | 3.27<br>(1.91,5.7)  | 4.03<br>(2.9,5.65)  |  |
| Alm                 | 0.58<br>(0.43,0.78) | 1.31<br>(0.9,1.93)  | 1.64<br>(1.1,2.45)  | 1.02<br>(0.7,1.51)  | 0.76<br>(0.54,1.07) | 1<br>(1,1)          | 2.71<br>(1.45,5.08) | 2.48<br>(1.37,4.55) | 3.05<br>(2.05,4.62) |  |
| RFC-Lite            | 0.22<br>(0.12,0.37) | 0.49<br>(0.29,0.8)  | 0.6<br>(0.33,1.12)  | 0.38<br>(0.2,0.69)  | 0.28<br>(0.16,0.5)  | 0.37<br>(0.2,0.69)  | 1<br>(1,1)          | 0.91<br>(0.48,1.77) | 1.14<br>(0.65,1.97) |  |
| R-Benda             | 0.23<br>(0.14,0.39) | 0.53<br>(0.34,0.81) | 0.66<br>(0.37,1.18) | 0.41<br>(0.23,0.71) | 0.31<br>(0.18,0.52) | 0.4<br>(0.22,0.73)  | 1.09<br>(0.56,2.08) | 1<br>(1,1)          | 1.23<br>(0.75,2.02) |  |

|                                                           |                     |                     |                     |                     |                     |                     |                     |                     |                     |
|-----------------------------------------------------------|---------------------|---------------------|---------------------|---------------------|---------------------|---------------------|---------------------|---------------------|---------------------|
| G-CIb                                                     | 0.19<br>(0.14,0.25) | 0.43<br>(0.34,0.54) | 0.54<br>(0.36,0.8)  | 0.33<br>(0.23,0.49) | 0.25<br>(0.18,0.35) | 0.33<br>(0.22,0.49) | 0.88<br>(0.51,1.55) | 0.81<br>(0.49,1.33) | 1<br>(1,1)          |
| <hr/> Random effects, with informative prior, model <hr/> |                     |                     |                     |                     |                     |                     |                     |                     |                     |
| CIb                                                       | 1<br>(1,1)          | 2.26<br>(1.56,3.29) | 2.84<br>(1.94,4.17) | 1.75<br>(1.2,2.5)   | 1.29<br>(0.97,1.65) | 1.72<br>(1.13,2.57) | 4.68<br>(2.35,9.32) | 4.26<br>(2.25,8.03) | 5.27<br>(3.51,7.78) |
| R-CIb                                                     | 0.44<br>(0.3,0.64)  | 1<br>(1,1)          | 1.25<br>(0.74,2.17) | 0.77<br>(0.45,1.3)  | 0.57<br>(0.35,0.89) | 0.76<br>(0.44,1.29) | 2.05<br>(1.17,3.63) | 1.87<br>(1.15,3.12) | 2.32<br>(1.6,3.35)  |
| Benda                                                     | 0.35<br>(0.24,0.52) | 0.8<br>(0.46,1.36)  | 1<br>(1,1)          | 0.62<br>(0.36,1.03) | 0.45<br>(0.28,0.71) | 0.61<br>(0.34,1.06) | 1.65<br>(0.75,3.6)  | 1.5<br>(0.72,3.12)  | 1.86<br>(1.08,3.2)  |
| O-CIb                                                     | 0.57<br>(0.4,0.83)  | 1.3<br>(0.77,2.21)  | 1.62<br>(0.97,2.79) | 1<br>(1,1)          | 0.74<br>(0.46,1.15) | 0.98<br>(0.57,1.71) | 2.68<br>(1.23,5.92) | 2.45<br>(1.16,5.15) | 3.01<br>(1.76,5.24) |
| F                                                         | 0.78<br>(0.61,1.03) | 1.76<br>(1.13,2.86) | 2.2<br>(1.41,3.58)  | 1.36<br>(0.87,2.15) | 1<br>(1,1)          | 1.35<br>(0.83,2.18) | 3.64<br>(1.76,7.7)  | 3.33<br>(1.69,6.59) | 4.1<br>(2.56,6.75)  |
| Alm                                                       | 0.58<br>(0.39,0.89) | 1.32<br>(0.77,2.3)  | 1.65<br>(0.94,2.93) | 1.02<br>(0.58,1.77) | 0.74<br>(0.46,1.21) | 1<br>(1,1)          | 2.72<br>(1.22,6.2)  | 2.48<br>(1.19,5.36) | 3.07<br>(1.73,5.43) |
| RFC-Lite                                                  | 0.21<br>(0.11,0.43) | 0.49<br>(0.28,0.86) | 0.61<br>(0.28,1.33) | 0.37<br>(0.17,0.81) | 0.27<br>(0.13,0.57) | 0.37<br>(0.16,0.82) | 1<br>(1,1)          | 0.91<br>(0.42,1.94) | 1.13<br>(0.57,2.21) |
| R-Benda                                                   | 0.23<br>(0.12,0.44) | 0.53<br>(0.32,0.87) | 0.67<br>(0.32,1.4)  | 0.41<br>(0.19,0.86) | 0.3<br>(0.15,0.59)  | 0.4<br>(0.19,0.84)  | 1.1<br>(0.52,2.36)  | 1<br>(1,1)          | 1.23<br>(0.66,2.28) |
| G-CIb                                                     | 0.19<br>(0.13,0.28) | 0.43<br>(0.3,0.63)  | 0.54<br>(0.31,0.92) | 0.33<br>(0.19,0.57) | 0.24<br>(0.15,0.39) | 0.33<br>(0.18,0.58) | 0.88<br>(0.45,1.75) | 0.81<br>(0.44,1.52) | 1<br>(1,1)          |

*Alm* alemtuzumab, *Benda* bendamustine, *Clb* chlorambucil, *CrI* credible interval, *F* fludarabine, *G-Clb* obinutuzumab + chlorambucil, *HR* hazard ratio, *O-Clb* ofatumumab + chlorambucil, *OS* overall survival, *R-Benda* rituximab + bendamustine, *R-Clb* rituximab + chlorambucil, *RFC* rituximab + fludarabine + cyclophosphamide



**Table S9** Additional analysis: summary of HRs and Crls for overall survival for all pairwise comparisons using a fixed effects and random effects, with informative prior, model

|                                               | HR (Crls)         |                   |                   |                   |                   |                   |                   |
|-----------------------------------------------|-------------------|-------------------|-------------------|-------------------|-------------------|-------------------|-------------------|
|                                               | Clb               | R-Clb             | Benda             | O-Clb             | F                 | R-Benda           | G-Clb             |
| Fixed effects model                           |                   |                   |                   |                   |                   |                   |                   |
| Clb                                           | 1 (1, 1)          | 1.66 (1.06, 2.6)  | 1.31 (0.89, 1.92) | 1.11 (0.7, 1.76)  | 1.18 (0.95, 1.47) | 1.66 (0.76, 3.67) | 2.07 (1.3, 3.3)   |
| R-Clb                                         | 0.6 (0.38, 0.95)  | 1 (1, 1)          | 0.79 (0.44, 1.42) | 0.67 (0.36, 1.25) | 0.71 (0.43, 1.17) | 1 (0.52, 1.97)    | 1.25 (0.81, 1.91) |
| Benda                                         | 0.76 (0.52, 1.12) | 1.27 (0.71, 2.3)  | 1 (1, 1)          | 0.85 (0.47, 1.51) | 0.9 (0.59, 1.4)   | 1.27 (0.54, 3.05) | 1.58 (0.88, 2.84) |
| O-Clb                                         | 0.9 (0.57, 1.43)  | 1.5 (0.8, 2.81)   | 1.18 (0.66, 2.14) | 1 (1, 1)          | 1.06 (0.64, 1.77) | 1.51 (0.61, 3.8)  | 1.87 (0.99, 3.57) |
| F                                             | 0.85 (0.68, 1.06) | 1.41 (0.85, 2.34) | 1.11 (0.71, 1.7)  | 0.94 (0.57, 1.56) | 1 (1, 1)          | 1.41 (0.62, 3.2)  | 1.76 (1.05, 2.91) |
| R-Benda                                       | 0.6 (0.27, 1.32)  | 1 (0.51, 1.91)    | 0.79 (0.33, 1.87) | 0.66 (0.26, 1.64) | 0.71 (0.31, 1.62) | 1 (1, 1)          | 1.25 (0.56, 2.73) |
| G-Clb                                         | 0.48 (0.3, 0.77)  | 0.8 (0.52, 1.24)  | 0.63 (0.35, 1.13) | 0.54 (0.28, 1.01) | 0.57 (0.34, 0.95) | 0.8 (0.37, 1.78)  | 1 (1, 1)          |
| Random effects, with informative prior, model |                   |                   |                   |                   |                   |                   |                   |
| Clb                                           | 1 (1, 1)          | 1.66 (1, 2.79)    | 1.3 (0.82, 2.09)  | 1.1 (0.65, 1.82)  | 1.17 (0.82, 1.61) | 1.7 (0.69, 4.01)  | 2.07 (1.24, 3.47) |
| R-Clb                                         | 0.6 (0.36, 1)     | 1 (1, 1)          | 0.78 (0.39, 1.59) | 0.66 (0.32, 1.37) | 0.7 (0.37, 1.26)  | 1.01 (0.49, 2.07) | 1.25 (0.75, 2.05) |
| Benda                                         | 0.77 (0.48, 1.22) | 1.28 (0.63, 2.59) | 1 (1, 1)          | 0.84 (0.42, 1.69) | 0.9 (0.5, 1.58)   | 1.31 (0.48, 3.5)  | 1.59 (0.78, 3.16) |
| O-Clb                                         | 0.91 (0.55, 1.53) | 1.51 (0.73, 3.15) | 1.18 (0.59, 2.39) | 1 (1, 1)          | 1.06 (0.57, 1.93) | 1.54 (0.55, 4.26) | 1.89 (0.9, 3.94)  |
| F                                             | 0.86 (0.62, 1.21) | 1.43 (0.79, 2.68) | 1.11 (0.63, 2.02) | 0.94 (0.52, 1.76) | 1 (1, 1)          | 1.44 (0.56, 3.67) | 1.77 (0.96, 3.28) |

|         |                   |                      |                     |                      |                      |                   |                      |
|---------|-------------------|----------------------|---------------------|----------------------|----------------------|-------------------|----------------------|
| R-Benda | 0.59 (0.25, 1.45) | 0.99<br>(0.48, 2.03) | 0.77<br>(0.29, 2.1) | 0.65<br>(0.23, 1.82) | 0.69<br>(0.27, 1.79) | 1<br>(1, 1)       | 1.23<br>(0.51, 2.98) |
| G-Clb   | 0.48 (0.29, 0.81) | 0.8 (0.49, 1.33)     | 0.63 (0.32, 1.27)   | 0.53 (0.25, 1.11)    | 0.57 (0.3, 1.04)     | 0.82 (0.34, 1.96) | 1 (1, 1)             |

---

*Benda* bendamustine, *Clb* chlorambucil, *CrI* credible interval, *F* fludarabine, *G-Clb* obinutuzumab + chlorambucil, *HR* hazard ratio, *O-Clb* ofatumumab + chlorambucil, *R-Benda* rituximab + bendamustine, *R-Clb* rituximab + chlorambucil

## REFERENCES

1. Dias S, Welton, NJ, Sutton AJ, Ades A. NICE DSU Technical Support Document 2: a generalised linear modelling framework for pairwise and network meta-analysis of randomised controlled trials. 2014. Available from: [http://www.nicedsu.org.uk/evidence-synthesis-tsd-series\(2391675\).htm](http://www.nicedsu.org.uk/evidence-synthesis-tsd-series(2391675).htm). Last accessed April 2016.
